# Supplementary material
Source: Springer Nature journal article supplement (https://www.springermedizin.de/resource/supplementary/12882_2011_376_MOESM1_ESM.pdf/9453432)

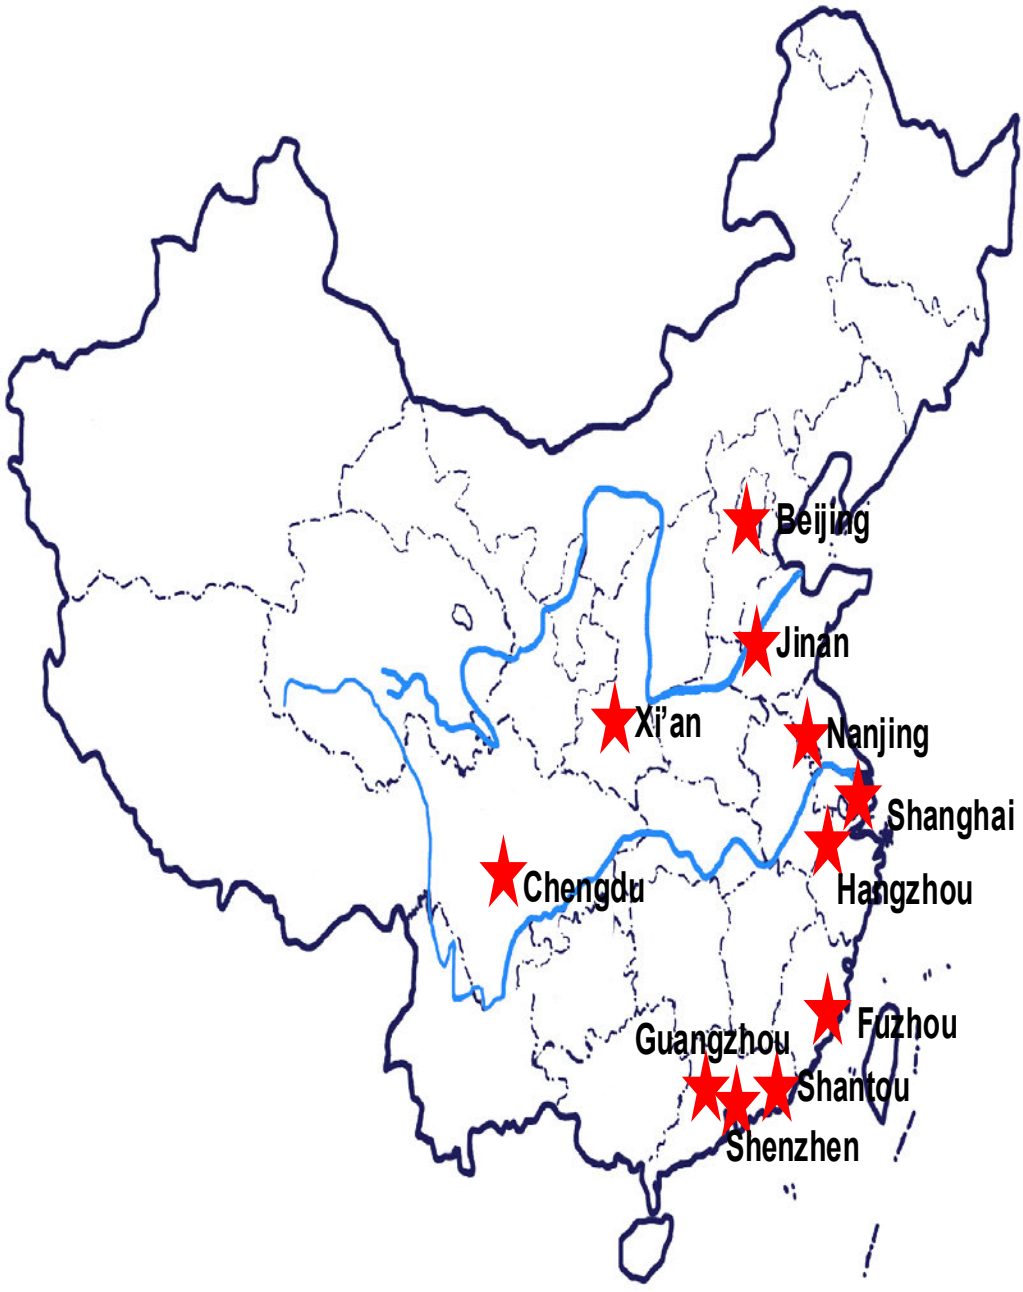

★ Beijing

★ Jinan

★ Xi'an

★ Nanjing

★ Shanghai

★ Chengdu

★ Hangzhou

★ Guangzhou

★ Fuzhou

★ Shantou

★ Shenzhen

Supplement: MOESM1 [file 9453432]
